# Supplementary material for: Development of Molecular Markers Associated with Resistance to Gray Mold Disease in Onion (Allium cepa L.) through RAPD-PCR and Transcriptome Analysis
Source: MDPI journal article supplement (doi:10.3390/horticulturae7110436), 2021-10-25
Supplement: s1 [file s1]

**Table S1.** Characteristics of four resistant lines (S&P 7129, S&P 7168, S&P 7521, and S&P 7522) and three susceptible lines (S&P 7130, S&P 7175, and S&P 7483) provided by ‘Seeds & People’ Co., Ltd. (Yeonggwang, Korea).

| Onion line | Resistant or Susceptible to gray mold | Bulb color | Maturity date |
|------------|---------------------------------------|------------|---------------|
| S&P 7129   | Resistant                             | Brown      | Moderate      |
| S&P 7168   | Resistant                             | Brown      | Late          |
| S&P 7521   | Resistant                             | Brown      | Late          |
| S&P 7522   | Resistant                             | Brown      | Late          |
| S&P 7130   | Susceptible                           | Brown      | Moderate      |
| S&P 7175   | Susceptible                           | Brown      | Late          |
| S&P 7483   | Susceptible                           | Brown      | Late          |

**Table S2.** Sequence information of 40 OPERON random primers used for RAPD analysis.

| No | Random primer | Sequence            | No | Random primer | Sequence            |
|----|---------------|---------------------|----|---------------|---------------------|
| 1  | OPAN-1        | 5'-ACT CCA CGT C-3' | 21 | OPL-1         | 5'-GGC ATG ACC T-3' |
| 2  | OPAN-2        | 5'-CAC CGC AGT T-3' | 22 | OPL-2         | 5'-TGG GCG TCA A-3' |
| 3  | OPAN-3        | 5'-AGC CAG GCT G-3' | 23 | OPL-3         | 5'-CCA GCA GCT T-3' |
| 4  | OPAN-4        | 5'-GGC GTA AGT C-3' | 24 | OPL-4         | 5'-GAC TGC ACA C-3' |
| 5  | OPAN-5        | 5'-GGG TGC AGT T-3' | 25 | OPL-5         | 5'-ACG CAG GCA C-3' |
| 6  | OPAN-6        | 5'-GGG AAC CCG T-3' | 26 | OPL-6         | 5'-GAG GGA AGA G-3' |
| 7  | OPAN-7        | 5'-TCG CTG CGG A-3' | 27 | OPL-7         | 5'-AGG CGG GAA C-3' |
| 8  | OPAN-8        | 5'-AAG GCT GCT G-3' | 28 | OPL-8         | 5'-AGC AGG TGG A-3' |
| 9  | OPAN-9        | 5'-GGG GGA GAT G-3' | 29 | OPL-9         | 5'-TGC GAG AGT C-3' |
| 10 | OPAN-10       | 5'-CTG TGT GCT C-3' | 30 | OPL-10        | 5'-ACG ATG AGC C-3' |
| 11 | OPAN-11       | 5'-GTC CAT GCA G-3' | 31 | OPL-11        | 5'-ACG ATG AGC C-3' |
| 12 | OPAN-12       | 5'-AAC GGC GGT C-3' | 32 | OPL-12        | 5'-GGG CGG TAC T-3' |
| 13 | OPAN-13       | 5'-CTT CCA GGA C-3' | 33 | OPL-13        | 5'-ACC GCC TGC T-3' |
| 14 | OPAN-14       | 5'-AGC CGG GTA A-3' | 34 | OPL-14        | 5'-GTG ACA GGC T-3' |
| 15 | OPAN-15       | 5'-TGA TGC CGC T-3' | 35 | OPL-15        | 5'-AAG AGAGGG G-3'  |
| 16 | OPAN-16       | 5'-GTG TCG AGT C-3' | 36 | OPL-16        | 5'-AGG TTG CAG G-3' |
| 17 | OPAN-17       | 5'-TCA GCA CAG G-3' | 37 | OPL-17        | 5'-AGC CTG AGC C-3' |
| 18 | OPAN-18       | 5'-TGT CCT GCG T-3' | 38 | OPL-18        | 5'-ACC ACC CAC C-3' |
| 19 | OPAN-19       | 5'-ACC ACG CCT T-3' | 39 | OPL-19        | 5'-GAG TGG TGA C-3' |
| 20 | OPAN-20       | 5'-GAG TCC TCA C-3' | 40 | OPL-20        | 5'-TGG TGG ACC A-3' |

**Table S3.** Results of raw data obtained by RNA-seq, trimming, and mapping.

| Sample ID | Raw data   |               |         | Trimmed data |               | Mapped read | Mapped bp     | Unmapped read |
|-----------|------------|---------------|---------|--------------|---------------|-------------|---------------|---------------|
|           | Raw_read   | Total_bp      | Q30 (%) | Total_read   | Total_bp      |             |               |               |
| S&P 7522  | 37,514,342 | 5,664,665,642 | 96.32   | 23,922,326   | 3,562,440,647 | 18,752,581  | 2,785,954,539 | 5,169,745     |
| S&P 7521  | 41,664,542 | 5,664,665,642 | 96.19   | 26,580,416   | 3,954,227,261 | 20,870,020  | 3,100,221,092 | 5,710,396     |
| S&P 7129  | 36,936,016 | 6,291,345,842 | 95.84   | 27,932,656   | 4,156,538,263 | 21,958,205  | 3,262,554,110 | 5,974,451     |
| S&P 7168  | 34,603,666 | 5,577,338,416 | 96.3    | 22,483,100   | 3,347,031,254 | 19,118,370  | 2,543,407,213 | 5,364,730     |
| S&P 7130  | 38,048,776 | 5,225,153,566 | 96.35   | 25,465,920   | 3,791,674,247 | 19,439,752  | 2,887,423,932 | 6,026,168     |
| S&P 7175  | 28,899,894 | 4,363,883,994 | 96.15   | 20,744,300   | 2,780,687,046 | 16,852,911  | 2,058,017,975 | 4,891,389     |
| S&P 7483  | 35,628,426 | 5,379,892,326 | 96.01   | 23,254,768   | 3,464,681,101 | 18,176,165  | 2,700,897,987 | 5,078,603     |

(A)

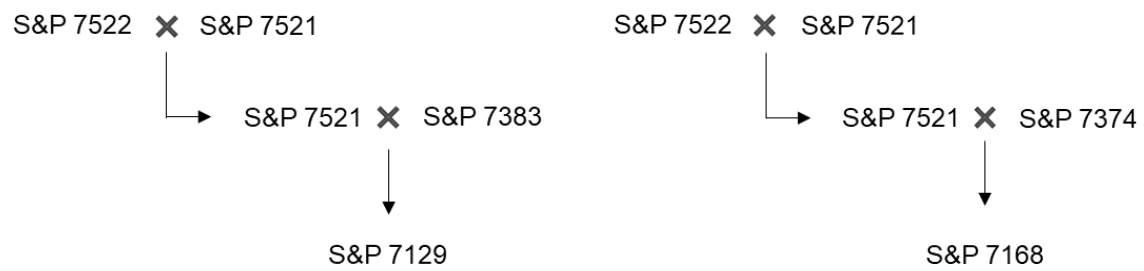

(B)

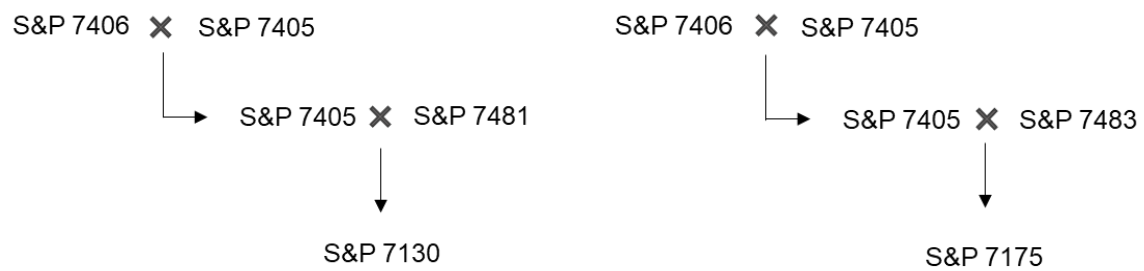

**Figure S1.** The pedigree of onion lines provided by ‘Seeds & People’ Co. (A) The pedigree of four resistant lines (S&P 7129, S&P 7168, S&P 7521, and S&P 7522). (B) The pedigree of three susceptible lines (S&P 7130, S&P 7175, and S&P 7483).

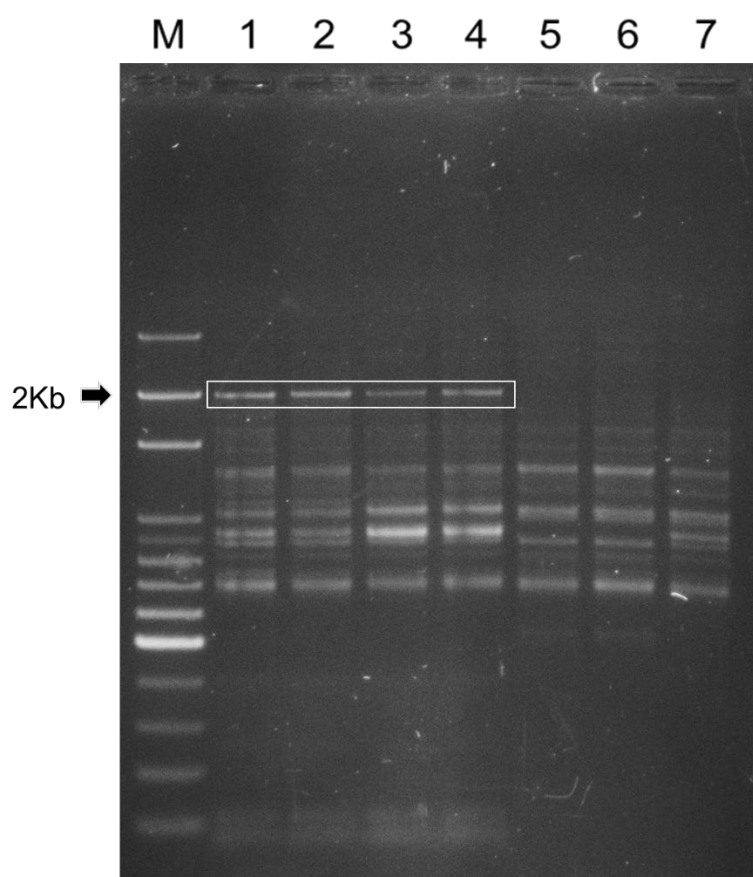

**Figure S2.** RAPD analysis of resistant and susceptible lines provided by 'Seeds & People' Co. by using the OPAN-1 random primer. The 2Kb bands were amplified in the resistant lines S&P 7522, S&P 7521, S&P 7129, and S&P 7168. M; 100bp DNA ladder marker, Lane 1; S&P 7522, Lane 2; S&P 7521, Lane 3; S&P 7129, Lane 4; S&P 7168, Lane 5; S&P 7483, Lane 6; S&P 7130, Lane 7; S&P 7175.

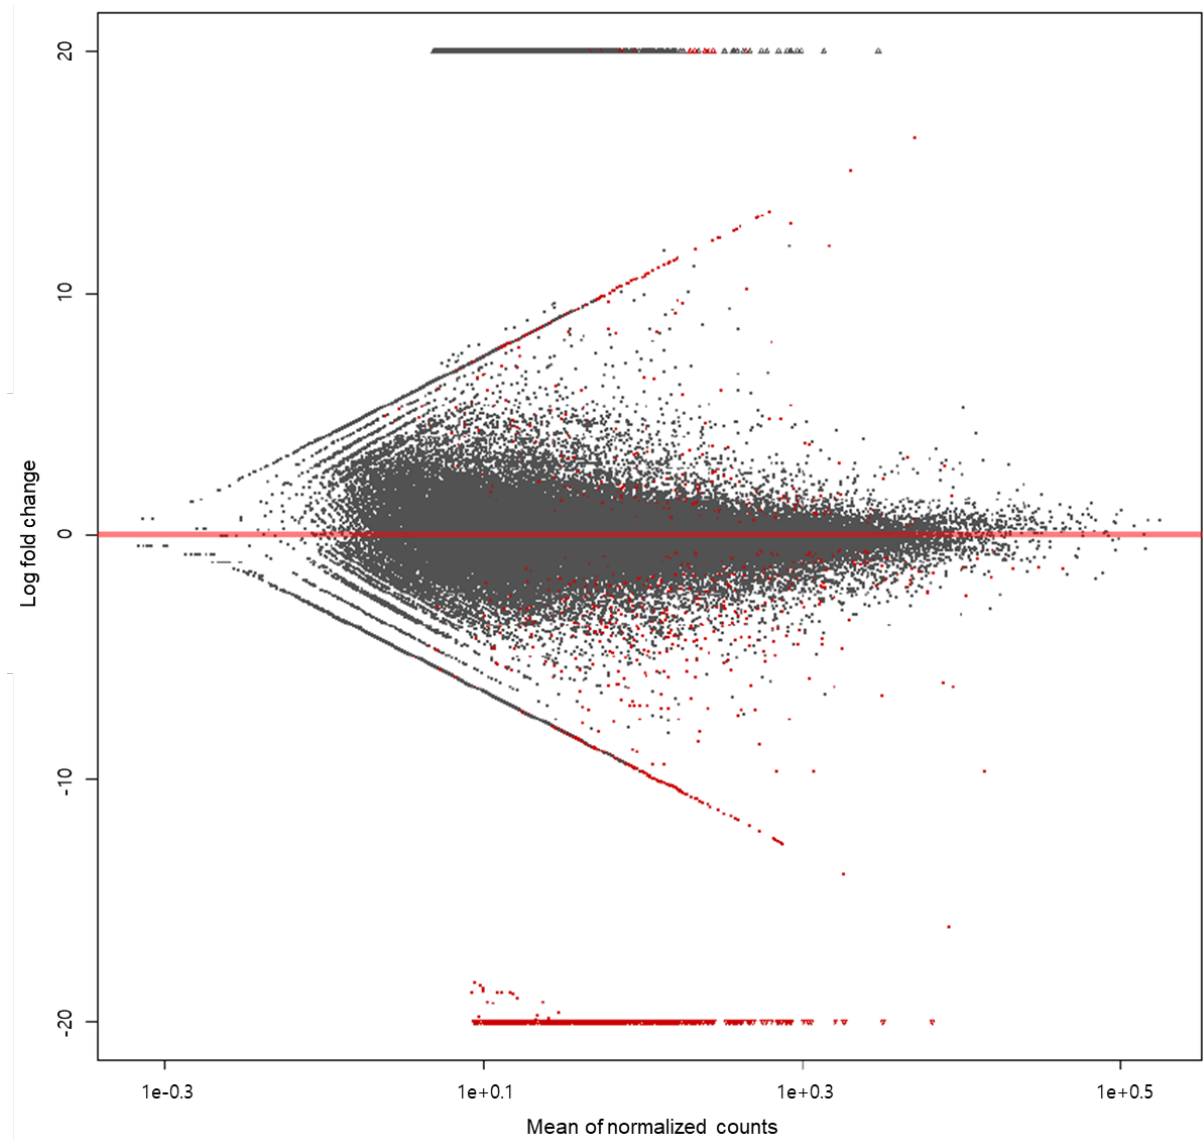

**Figure S3.** MA plot to verify significantly expressed genes in groups of resistant and susceptible lines. False discovery rate (FDR) of less than 0.05 is indicated in red. It was verified that the significantly expressed genes (red color) were identified to be sufficient for subsequent resistance-related gene analysis.

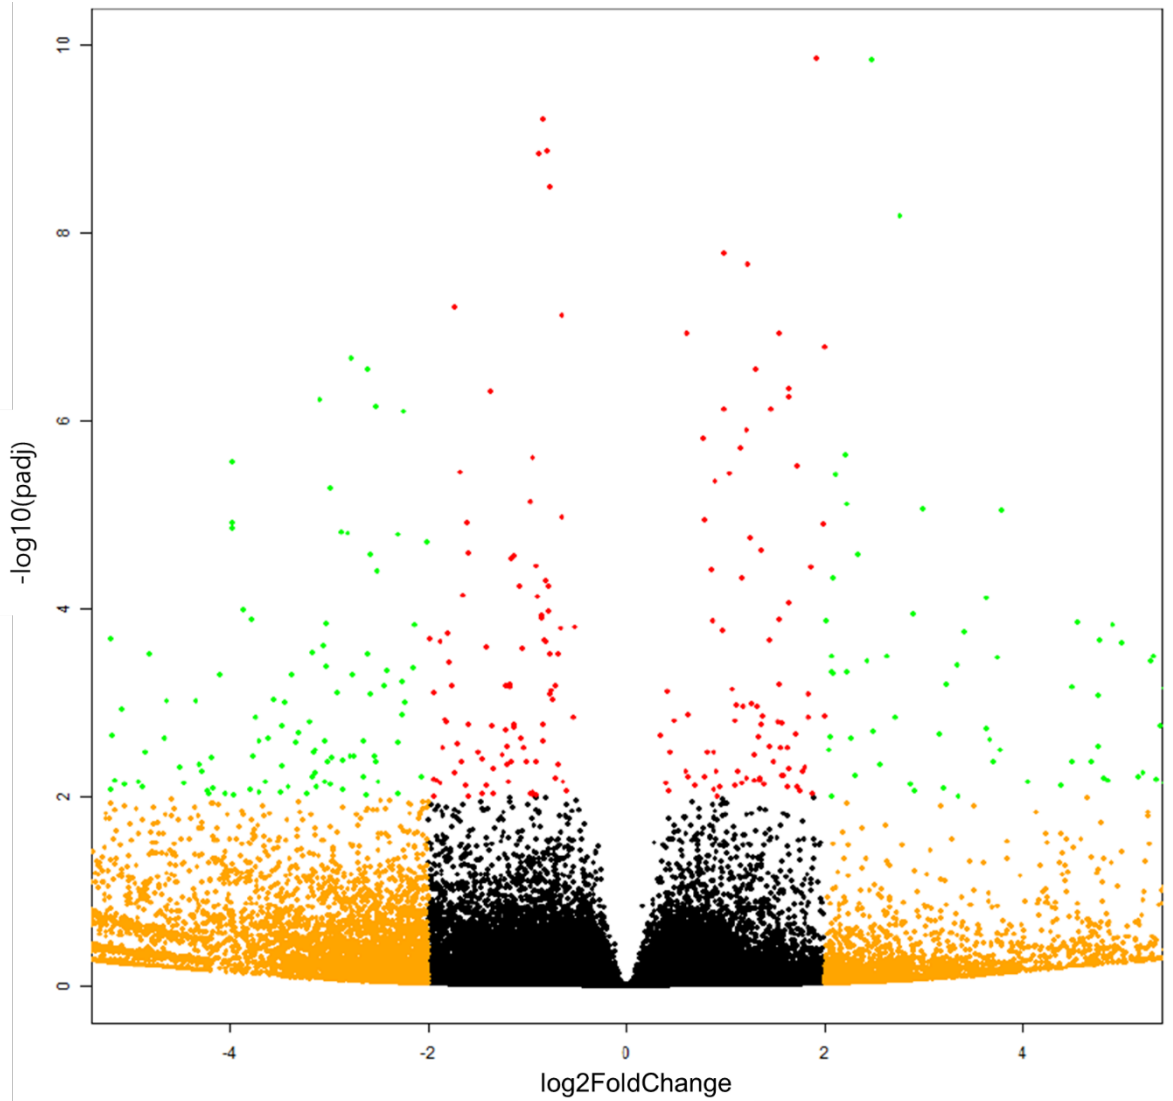

**Figure S4.** Volcano plot of transcripts satisfied following condition:  $\text{FDR} < 0.05$ ,  $|\log_2\text{fold change}| \geq 2$ . Red;  $\text{FDR} < 0.01$  &  $|\log_2\text{fold change}| \leq 2$ , green;  $\text{FDR} < 0.01$  &  $|\log_2\text{fold change}| > 2$ , orange;  $\text{FDR} \geq 0.01$  &  $|\log_2\text{fold change}| > 2$ .

**(A) Cellular Component**

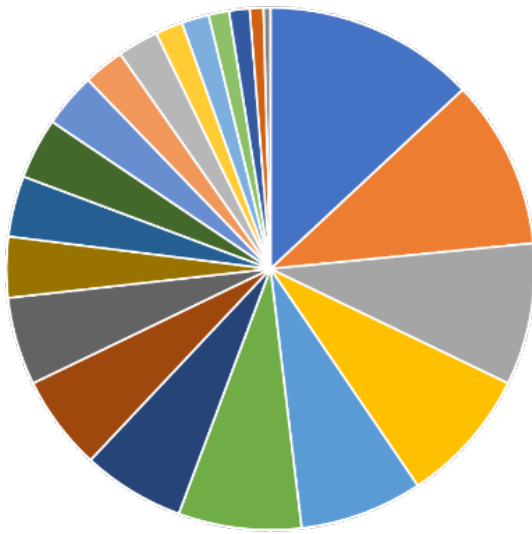

| GO Cellular Component          | Gene count |
|--------------------------------|------------|
| nucleus                        | 31         |
| chloroplast                    | 25         |
| cytoplasm                      | 21         |
| other intracellular components | 20         |
| plastid                        | 18         |
| mitochondrion                  | 18         |
| cytosol                        | 15         |
| plasma membrane                | 14         |
| other membranes                | 13         |
| thylakoid                      | 9          |
| other cellular components      | 9          |
| Golgi apparatus                | 9          |
| extracellular region           | 8          |
| vacuole                        | 6          |
| nucleolus                      | 6          |
| endoplasmic reticulum          | 4          |
| endosome                       | 4          |
| cell wall                      | 3          |
| ribosome                       | 3          |
| peroxisome                     | 2          |
| nucleoplasm                    | 1          |

**(B) Molecular Function**

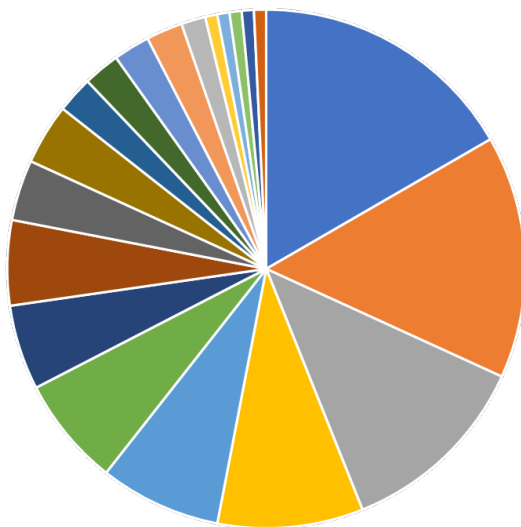

| GO Molecular Function                     | Gene count |
|-------------------------------------------|------------|
| protein binding                           | 22         |
| catalytic activity                        | 20         |
| other binding                             | 16         |
| transferase activity                      | 12         |
| DNA binding                               | 10         |
| RNA binding                               | 9          |
| hydrolase activity                        | 7          |
| nucleic acid binding                      | 7          |
| transporter activity                      | 5          |
| DNA-binding transcription factor activity | 5          |
| kinase activity                           | 3          |
| lipid binding                             | 3          |
| unknown molecular functions               | 3          |
| signaling receptor activity               | 3          |
| enzyme regulator activity                 | 2          |
| nucleotide binding                        | 1          |
| carbohydrate binding                      | 1          |
| translation factor activity, RNA binding  | 1          |
| structural molecule activity              | 1          |
| nuclease activity                         | 1          |



(C) Biological Process

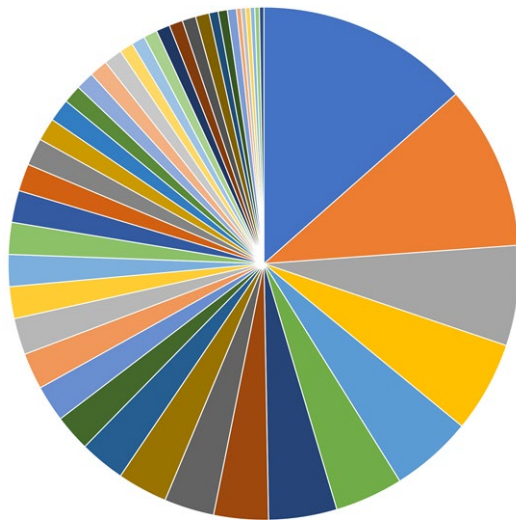

| GO Biological Process                            | Gene count |
|--------------------------------------------------|------------|
| other cellular processes                         | 47         |
| other metabolic processes                        | 36         |
| response to stress                               | 22         |
| biosynthetic process                             | 20         |
| response to chemical                             | 18         |
| multicellular organism development               | 15         |
| anatomical structure development                 | 15         |
| nucleobase-containing compound metabolic process | 12         |
| cellular component organization                  | 11         |
| response to external stimulus                    | 11         |
| response to abiotic stimulus                     | 10         |
| reproduction                                     | 8          |
| cellular protein modification process            | 8          |
| response to light stimulus                       | 8          |
| post-embryonic development                       | 8          |
| transport                                        | 7          |
| response to endogenous stimulus                  | 7          |
| response to biotic stimulus                      | 7          |
| protein metabolic process                        | 7          |
| lipid metabolic process                          | 6          |
| signal transduction                              | 6          |
| growth                                           | 5          |
| catabolic process                                | 5          |
| cell growth                                      | 4          |
| cell communication                               | 4          |
| photosynthesis                                   | 4          |
| carbohydrate metabolic process                   | 4          |
| cell differentiation                             | 3          |
| regulation of molecular function                 | 3          |
| cellular homeostasis                             | 3          |
| unknown biological processes                     | 3          |
| embryo development                               | 3          |
| pollination                                      | 3          |
| translation                                      | 3          |
| flower development                               | 2          |
| DNA metabolic process                            | 2          |
| generation of precursor metabolites and energy   | 2          |
| tropism                                          | 1          |
| secondary metabolic process                      | 1          |
| cell cycle                                       | 1          |
| circadian rhythm                                 | 1          |
| cell death                                       | 1          |
| other biological processes                       | 1          |

**Figure S5.** GO annotation of 182 transcripts with increased expression levels. (A); Cellular component, (B); Molecular function, (C); Biological process.
